# Supplementary material for: Antibody-Mediated Porcine Reproductive and Respiratory Syndrome Virus Infection Downregulates the Production of Interferon-α and Tumor Necrosis Factor-α in Porcine Alveolar Macrophages via Fc Gamma Receptor I and III
Source: PubMed Central journal article supplement (PMC7077232; doi:10.3390/v12020187), 2020-02-08
Supplement: viruses-12-00187-s001.pdf [file viruses-12-00187-s001.pdf]

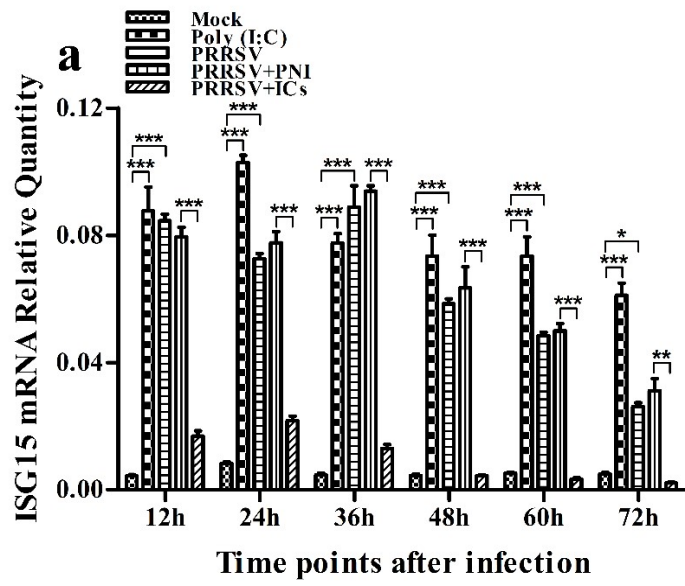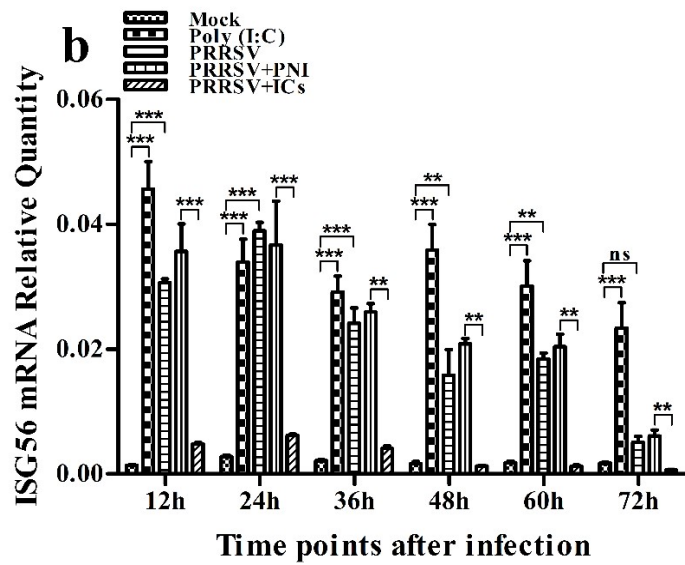

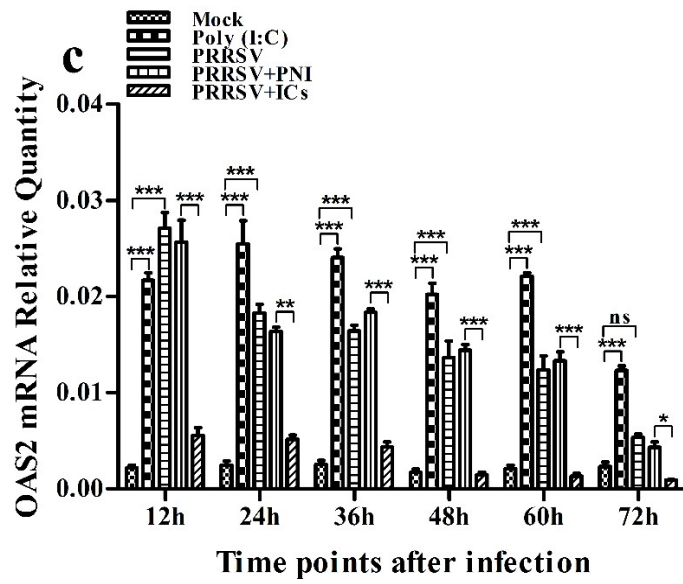

Figure S1. Effect of PRRSV infection or PRRSV-ADE infection on mRNA expression of antiviral genes in porcine AMs. Relative quantitative RT-PCR analysis of antiviral gene mRNA levels in mock cells or poly (I:C)-stimulated cells or PRRSV-infected cells or PRRSV+PNI-infected cells or PRRSV+ICs-infected cells. (a) ISG15 mRNA level; (b) ISG56 mRNA level; (c) OAS2 mRNA level. \*\*\* $p < 0.001$ , \*\* $p < 0.01$ , \* $p < 0.05$ , ns: no significance.

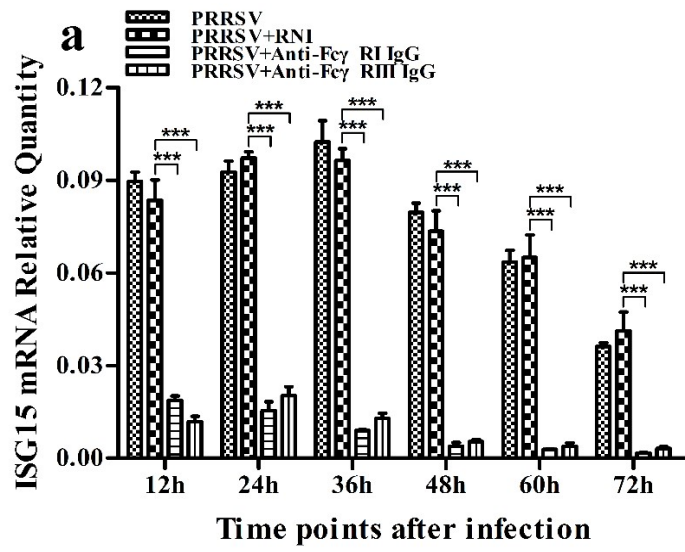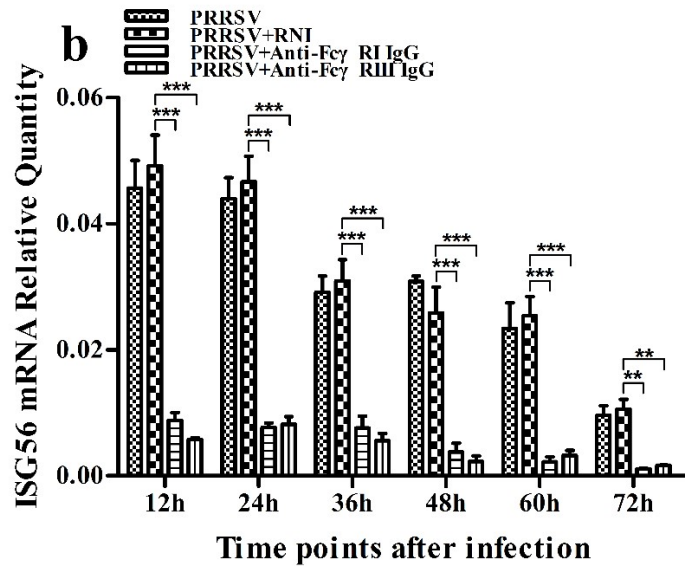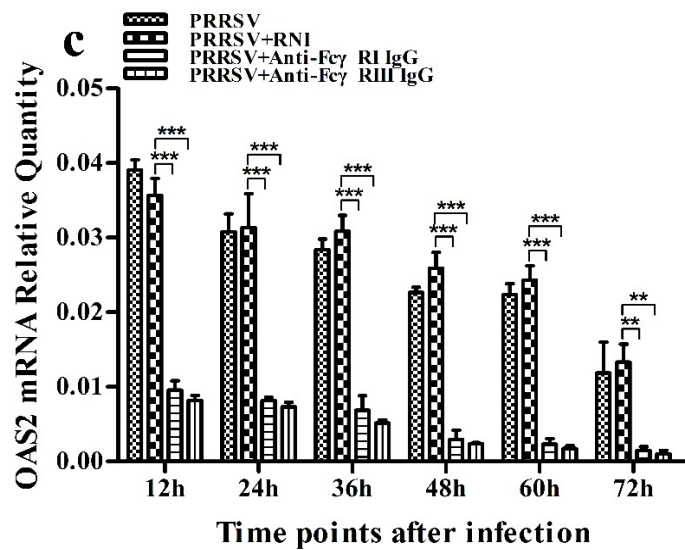

Figure S2. Effect of Fc $\gamma$ RI or Fc $\gamma$ RIII on PRRSV-induced mRNA expression of antiviral genes in porcine AMs. Relative quantitative RT-PCR analysis of antiviral gene mRNA levels in PRRSV-infected cells pretreated with RNI or anti-Fc $\gamma$ RI IgG or anti-Fc $\gamma$ RIII IgG. (a) ISG15 mRNA level; (b) ISG56 mRNA level; (c) OAS2 mRNA level. \*\*\* $p$  < 0.001, \*\* $p$  < 0.01.

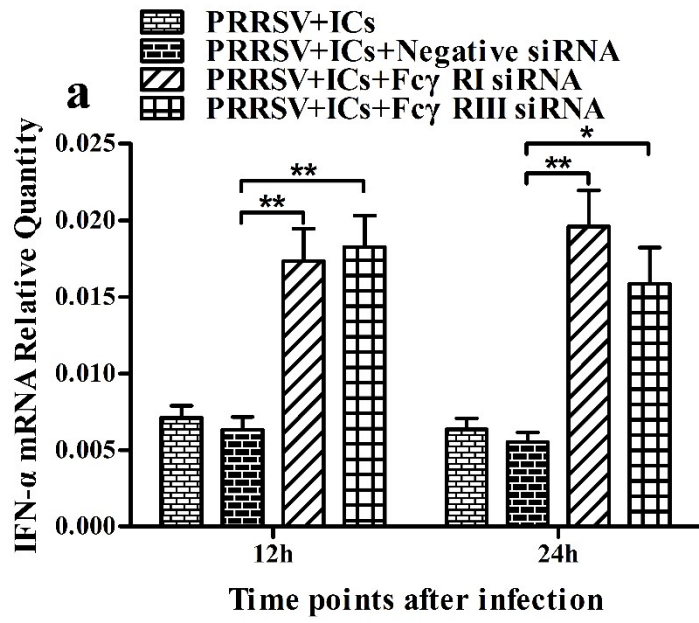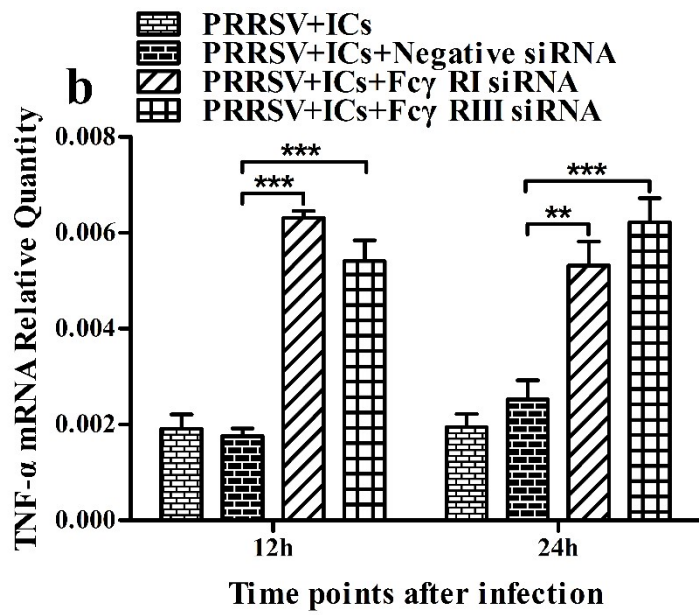

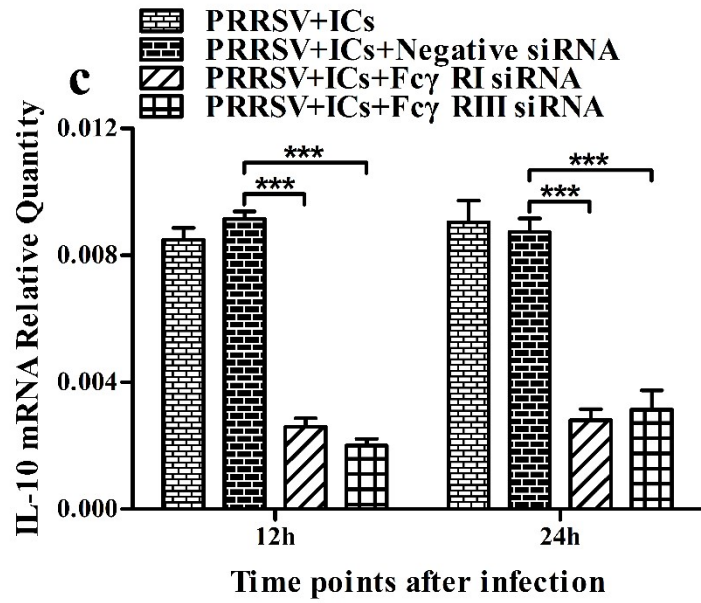

Figure S3. Effect of Fc $\gamma$ RI gene knockdown or Fc $\gamma$ RIII gene knockdown on mRNA expression of cytokines in porcine AMs during PRRSV-ADE infection. The cells were transfected with Fc $\gamma$ RI siRNA or Fc $\gamma$ RIII siRNA or negative siRNA for 48h and then infected with PRRSV+ICs. Relative quantitative RT-PCR analysis of cytokine mRNA levels in PRRSV+ICs-infected cells transfected with Fc $\gamma$ RI siRNA or Fc $\gamma$ RIII siRNA or negative siRNA. (a) IFN- $\alpha$  mRNA level; (b) TNF- $\alpha$  mRNA level; (c) IL-10 mRNA level. \*\*\* $p$ < 0.001, \*\* $p$ < 0.01, \* $p$ < 0.05.

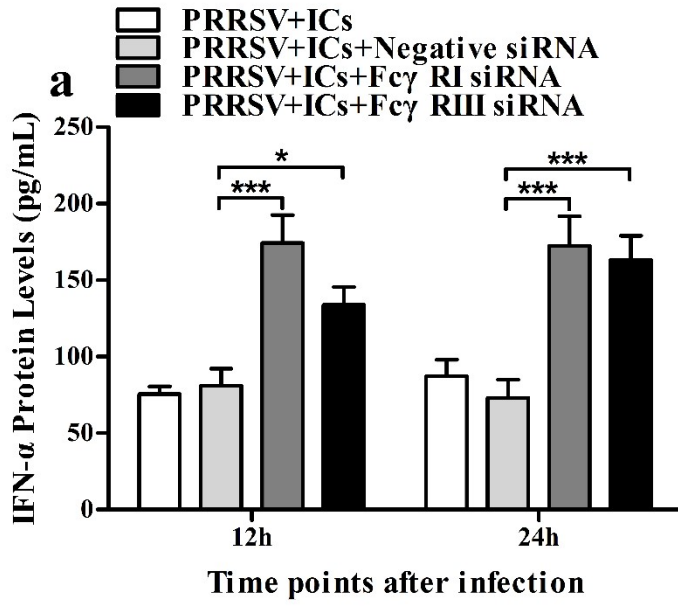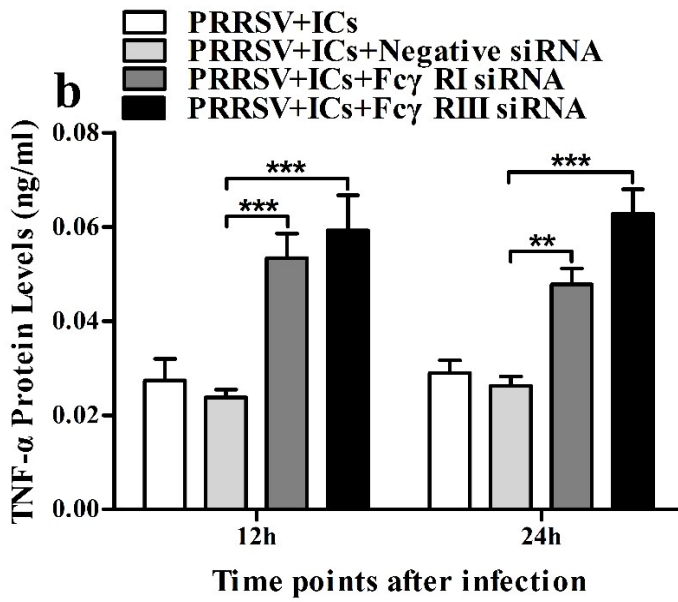

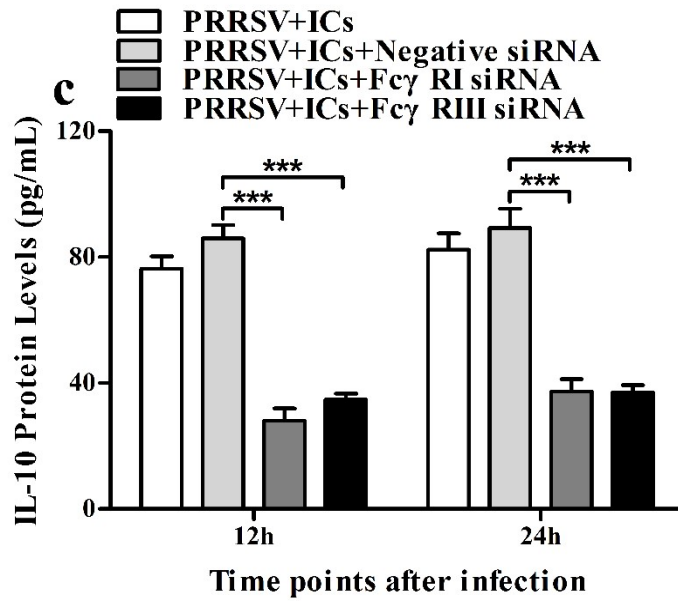

Figure S4. Effect of Fc $\gamma$ RI gene knockdown or Fc $\gamma$ RIII gene knockdown on protein expression of cytokines in porcine AMs during PRRSV-ADE infection. The cells were transfected with Fc $\gamma$ RI siRNA or Fc $\gamma$ RIII siRNA or negative siRNA for 48h and then infected with PRRSV+ICs. Cytokine protein levels in culture supernatants of PRRSV+ICs-infected cells transfected with Fc $\gamma$ RI siRNA or Fc $\gamma$ RIII siRNA or negative siRNA were detected by using ELISA Kits. (a) IFN- $\alpha$  protein level; (b) TNF- $\alpha$  protein level; (c) IL-10 protein level. \*\*\* $p$  < 0.001, \*\* $p$  < 0.01, \* $p$  < 0.05.
